# Supplementary material for: Tuning cation-binding selectivity and capacity via side chain-dependent molecular packing in the solid state
Source: Royal Society of Chemistry journal article supplement (doi:10.1039/c6cc04526j), 2016-01-01
Supplement: c6cc04526j1.pdf [file c6cc04526j1.pdf]

## Supplementary Material for:

### Tuning Cation-Binding Selectivity and Capacity via Side Chain-Dependent Molecular Packing in Solid State

Jie Shen, Changliang Ren and Huaqiang Zeng\*

Department of Chemistry, 3 Science Drive 3, National University of Singapore, Singapore 117543

Corresponding Author: [hqzeng@ibn.a-star.edu.sg](mailto:hqzeng@ibn.a-star.edu.sg)

#### General Remarks

All the chemicals were obtained from commercial suppliers and used as received unless otherwise noted. Aqueous solutions were prepared from MiliQ water. ICP data were recorded on Thermo Fisher X Series 2. Transmission electron microscopy (TEM) images were recorded on JEOL 3010 microscope equipped with energy-dispersive X-ray spectroscopy. Scanning electron microscopy (SEM) images were recorded on a JEOL JSM-5200 Microscope. Powder XRD patterns were recorded on a Bruker D8 Avance diffractometer using Cu radiation ( $\lambda = 1.5406 \text{ \AA}$ ).

#### Preparation of the Nanofibers and Nanoplates

The nanofibers, nanosheets and nanoplates formed by pentamers **1-3** were prepared by slow diffusion of varying solvents such as ethyl acetate into pentamer-containing DMSO solution. Typically, 1 mg of pentamer was dissolved in 0.4 mL of DMSO to prepare a clear solution, which was then transferred to a NMR tube. 100  $\mu\text{L}$  of DMSO was added onto the top of this sample-containing DMSO solution with the remaining part of the NMR tube filled with various organic solvents. 2-4 weeks later, the slowly formed fibers, sheets or plates were transferred into an eppendorf tube and centrifuged. The supernatant was decanted and solid residue was washed with ethyl acetate and centrifuged three times. 1 mL of ethyl acetate was then added into the tube to re-suspend the fibers.

## **Inductively Coupled Plasma Mass Spectrometry (ICP-MS)**

For ICP measurement, the concentration of each metal ion is set constant at 0.10 mM in H<sub>2</sub>O containing 1% HNO<sub>3</sub>, and that of macrocyclic hosts **1** is set to be at [host]:[total metal ion] = 1 or 1:5. Extractions were carried out in a biphasic liquid-solid method, which involves shaking the suspended solid in aqueous solution for 24 hours at 25 °C. After filtration of the aqueous solution using 0.45 μm syringe filter, the concentration of the residual ions in the aqueous layer was measured and referred to as C<sub>1</sub>. The control experiments using CHCl<sub>3</sub> containing no organic host were also carried out at 25 °C. After filtration of the aqueous solution using 0.45 μm syringe filter, the concentration of the residual ions in the aqueous layer was measured and referred to as C<sub>2</sub>. A difference between C<sub>2</sub> and C<sub>1</sub> is divided by the original concentration of the ion to yield the extraction efficiency. All the reported data are averaged values over six runs with relative errors within 2%, and only extraction efficiencies of ≥ 2% are listed.

**Table S1** Extraction efficiencies (%) of 18 metal ions by nanostructured **1-3** as determined by inductively coupled plasma mass spectrometry (ICP).

|                      | Na <sup>+</sup>    | K <sup>+</sup> | Rb <sup>+</sup> | Cs <sup>+</sup> | Ba <sup>2+</sup> | Cu <sup>2+</sup> | Ag <sup>+</sup> | Hg <sup>2+</sup> | Pb <sup>2+</sup> | Li <sup>+</sup> , Mg <sup>2+</sup> , Ca <sup>2+</sup> , Al <sup>3+</sup> , Mn <sup>2+</sup> ,<br>Fe <sup>3+</sup> , Ni <sup>2+</sup> , Zn <sup>2+</sup> , Cd <sup>2+</sup> | Total<br>Extraction <sup>c</sup> |     |
|----------------------|--------------------|----------------|-----------------|-----------------|------------------|------------------|-----------------|------------------|------------------|----------------------------------------------------------------------------------------------------------------------------------------------------------------------------|----------------------------------|-----|
| <b>1<sup>a</sup></b> | Dioxane            | 10             | 11              | 8               | <b>28</b>        | 7                | -               | 13               | -                | -                                                                                                                                                                          | 77                               |     |
|                      | Ethyl Acetate      | 12             | 9               | 7               | 29               | 11               | -               | <b>43</b>        | -                | -                                                                                                                                                                          | 111                              |     |
|                      | Ethanol            | 3              | 11              | 9               | <b>29</b>        | 13               | -               | 12               | -                | -                                                                                                                                                                          | 77                               |     |
|                      | Acetone            | 7              | 4               | 3               | 17               | 4                | -               | <b>29</b>        | -                | -                                                                                                                                                                          | 64                               |     |
|                      | Acetonitrile       | 9              | 3               | -               | 6                | 4                | -               | <b>40</b>        | -                | -                                                                                                                                                                          | 62                               |     |
|                      | Ether              | 5              | 7               | -               | 9                | 4                | -               | <b>19</b>        | -                | -                                                                                                                                                                          | 44                               |     |
|                      | Tetrahydrofuran    | 9              | 3               | 5               | 17               | 8                | -               | <b>37</b>        | -                | -                                                                                                                                                                          | 79                               |     |
|                      | <b>Powder form</b> | 3              | 5               | -               | -                | -                | -               | <b>18</b>        | 6                | -                                                                                                                                                                          | -                                |     |
| <b>2<sup>a</sup></b> | Dioxane            | 8              | <b>15</b>       | -               | -                | -                | 3               | 7                | 5                | -                                                                                                                                                                          | 38                               |     |
|                      | Ethyl Acetate      | <b>11</b>      | <b>9</b>        | -               | -                | -                | -               | <b>11</b>        | 5                | -                                                                                                                                                                          | 36                               |     |
|                      | Ethanol            | <b>8</b>       | <b>9</b>        | -               | 4                | -                | 3               | 5                | -                | 3                                                                                                                                                                          | 32                               |     |
|                      | Acetone            | 5              | 12              | -               | 4                | -                | -               | <b>24</b>        | <b>23</b>        | 4                                                                                                                                                                          | 72                               |     |
|                      | Acetonitrile       | 6              | 5               | -               | -                | -                | -               | 8                | <b>14</b>        | -                                                                                                                                                                          | 33                               |     |
|                      | Ether              | 10             | 7               | -               | 5                | 3                | -               | <b>14</b>        | 11               | 3                                                                                                                                                                          | 53                               |     |
|                      | Tetrahydrofuran    | 5              | <b>13</b>       | 3               | 8                | 5                | 4               | 6                | -                | 4                                                                                                                                                                          | 48                               |     |
|                      | <b>Powder form</b> | 3              | 4               | 4               | 7                | 4                | 4               | <b>13</b>        | <b>10</b>        | 3                                                                                                                                                                          | -                                |     |
| <b>3<sup>a</sup></b> | Dioxane            | 10             | 13              | >99             | >99              | 97               | 11              | 92               | 76               | 86                                                                                                                                                                         | -                                | 583 |
|                      | Ethyl Acetate      | 6              | 9               | >99             | >99              | >99              | 12              | 89               | 79               | 90                                                                                                                                                                         | -                                | 582 |
|                      | Ethanol            | 13             | 7               | >99             | >99              | >99              | 18              | 95               | 84               | 97                                                                                                                                                                         | -                                | 611 |
|                      | Acetone            | 11             | 12              | >99             | >99              | >99              | 5               | 90               | 83               | 93                                                                                                                                                                         | -                                | 591 |
|                      | Acetonitrile       | 10             | 16              | >99             | >99              | 98               | 11              | 95               | 78               | 90                                                                                                                                                                         | -                                | 596 |
|                      | Ether              | 9              | 9               | >99             | >99              | >99              | 15              | 94               | 86               | 97                                                                                                                                                                         | -                                | 607 |
|                      | Tetrahydrofuran    | 9              | 11              | >99             | >99              | >99              | 4               | 74               | 74               | 73                                                                                                                                                                         | -                                | 542 |
|                      | <b>Powder form</b> | -              | -               | 80              | 98               | 72               | 4               | 15               | 13               | 8                                                                                                                                                                          | -                                | -   |
| <b>2<sup>b</sup></b> | 86                 | >99            | >99             | >99             | >99              | 52               | 85              | 60               | 94               | Ca <sup>2+</sup> (55)                                                                                                                                                      | 828                              |     |

<sup>a</sup> The concentration of each metal ion in H<sub>2</sub>O is set constant at 0.10 mM, producing a total concentration of 1.80 mM for 18 metal ions. Nanostructured organic hosts formed from seven solvents shown in Fig. 2 were added at [host]:[total metal ion] = 1:1, followed by shaking the biphasic water–solid system for 24 hours at 25 °C. Ion extractions from aqueous phase to suspended solid were monitored by measuring the residual concentrations of various metal ions in H<sub>2</sub>O layer. Relative errors of ≤ 2% were obtained after averaging the data over 6 run, and only extraction efficiencies of ≥ 2% are listed. Metal nitrates were used for all metal ions.

<sup>b</sup> A chloroform solution containing host **2** at 1.80 mM was added into an aqueous solution containing 18 metal ions at [total metal ion] = 1.80 mM ([host]:[total metal ion] = 1:1). After shaking the biphasic water–CHCl<sub>3</sub> system for 24 hours at 25 °C. ion extractions from aqueous phase to suspended solid were monitored by measuring the residual concentrations of various metal ions in H<sub>2</sub>O layer.

<sup>c</sup> The sum of extraction percentages involving all the extractable ions.

**Table S2** Extraction efficiencies (%) of 18 metal ions by nanostructured **1-3** as determined by inductively coupled plasma mass spectrometry (ICP).

|                              | Na <sup>+</sup> | K <sup>+</sup> | Rb <sup>+</sup> | Cs <sup>+</sup> | Ba <sup>2+</sup> | Cu <sup>2+</sup> | Ag <sup>+</sup> | Hg <sup>2+</sup> | Pb <sup>2+</sup> | Li <sup>+</sup> , Mg <sup>2+</sup> , Ca <sup>2+</sup> , Al <sup>3+</sup> , Mn <sup>2+</sup> ,<br>Fe <sup>3+</sup> , Ni <sup>2+</sup> , Zn <sup>2+</sup> , Cd <sup>2+</sup> | Total<br>Extraction <sup>c</sup> |
|------------------------------|-----------------|----------------|-----------------|-----------------|------------------|------------------|-----------------|------------------|------------------|----------------------------------------------------------------------------------------------------------------------------------------------------------------------------|----------------------------------|
| Dioxane                      | 4               | 11             | 28              | 70              | 24               | -                | 7               | -                | 4                | -                                                                                                                                                                          | 148                              |
| Ethyl Acetate                | -               | 10             | 43              | 81              | 25               | -                | 11              | -                | 7                | -                                                                                                                                                                          | 177                              |
| Ethanol                      | 7               | -              | 29              | 69              | 25               | -                | 7               | -                | 4                | -                                                                                                                                                                          | 141                              |
| <b>3<sup>a</sup></b> Acetone | 6               | 13             | 19              | 50              | 21               | -                | 8               | -                | 6                | -                                                                                                                                                                          | 123                              |
| Acetonitrile                 | -               | 7              | 36              | 73              | 18               | -                | 11              | -                | 5                | -                                                                                                                                                                          | 150                              |
| Ether                        | 5               | 9              | 36              | 78              | 28               | -                | 8               | -                | 5                | -                                                                                                                                                                          | 169                              |
| Tetrahydrofuran              | -               | 8              | 37              | 75              | 28               | -                | 10              | -                | 6                | -                                                                                                                                                                          | 164                              |
| <b>2<sup>b</sup></b>         | 14              | 74             | 47              | 97              | 90               | 8                | 23              | 17               | -                | Ca <sup>2+</sup> (10)                                                                                                                                                      | 380                              |

<sup>a</sup> The concentration of each metal ion in H<sub>2</sub>O is set constant at 0.10 mM, producing a total concentration of 1.80 mM for 18 metal ions. Nanostructured organic hosts formed by **3** from seven solvents shown in Fig. 2 were added at [host]:[total metal ion] = 1:5, followed by shaking the biphasic water–solid system for 24 hours at 25 °C. Ion extractions from aqueous phase to suspended solid were monitored by measuring the residual concentrations of various metal ions in H<sub>2</sub>O layer. Relative errors of ≤ 2% were obtained after averaging the data over 6 run, and only extraction efficiencies of ≥ 2% are listed. Metal nitrates were used for all metal ions.

<sup>b</sup> A chloroform solution containing host **2** at 0.54 mM was added into an aqueous solution containing 18 metal ions at [total metal ion] = 1.80 mM ([host]:[total metal ion] = 1:3.3). After shaking the biphasic water–CHCl<sub>3</sub> system for 24 hours at 25 °C. ion extractions from aqueous phase to suspended solid were monitored by measuring the residual concentrations of various metal ions in H<sub>2</sub>O layer.

<sup>c</sup> The sum of extraction percentages involving all the extractable ions.

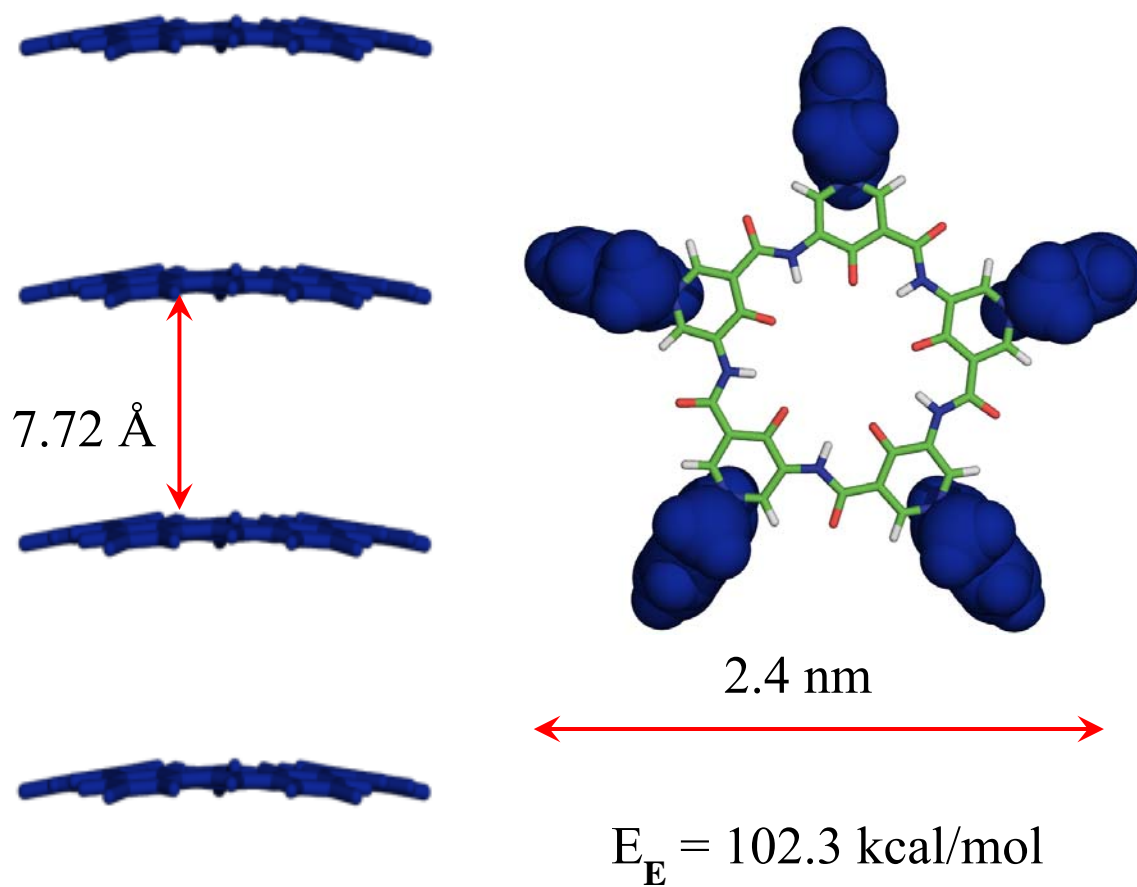

## Eclipsed packing

**Figure S1.** Computationally determined eclipsed packing by **3** and the corresponding energy normalized based on the most stable twisted packing.

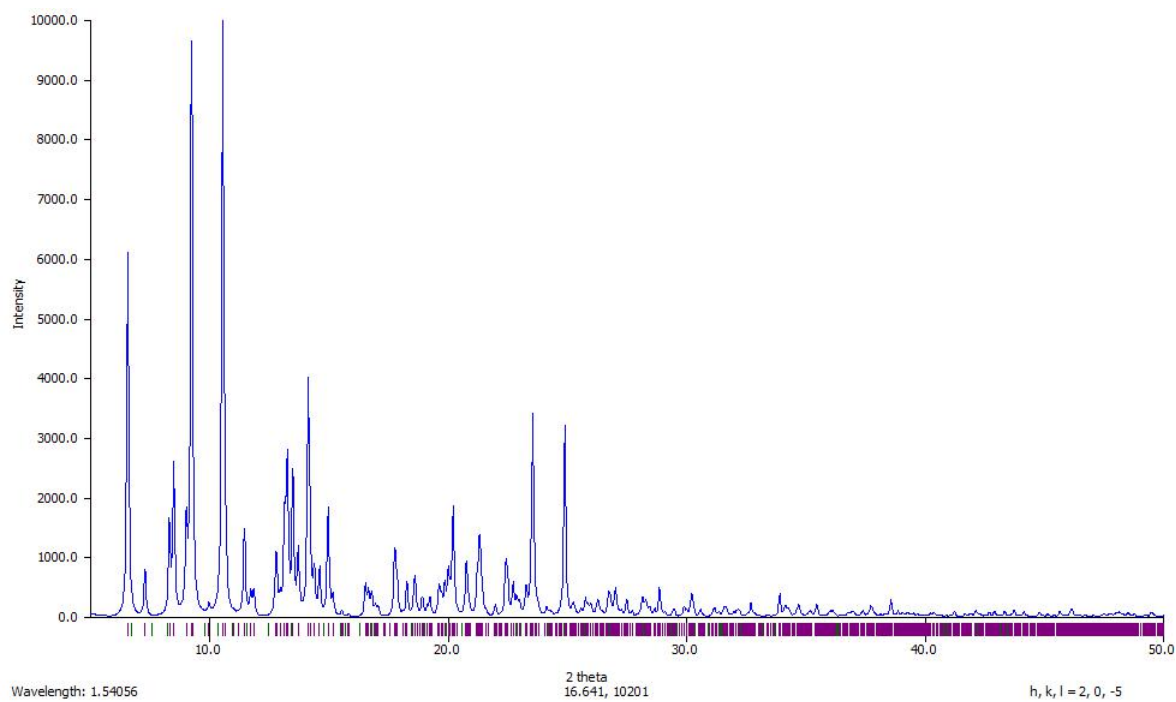

**Figure S1.** XRD pattern of single crystals of **3**.

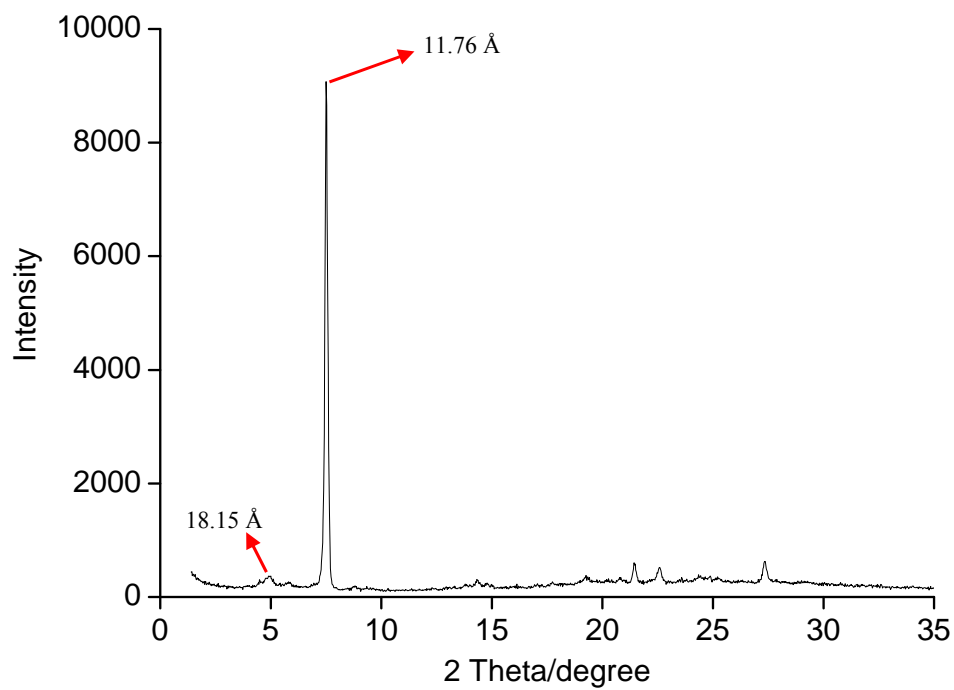

**Figure S2.** XRD pattern of nanoplates formed by **3** in DMSO/dioxane.

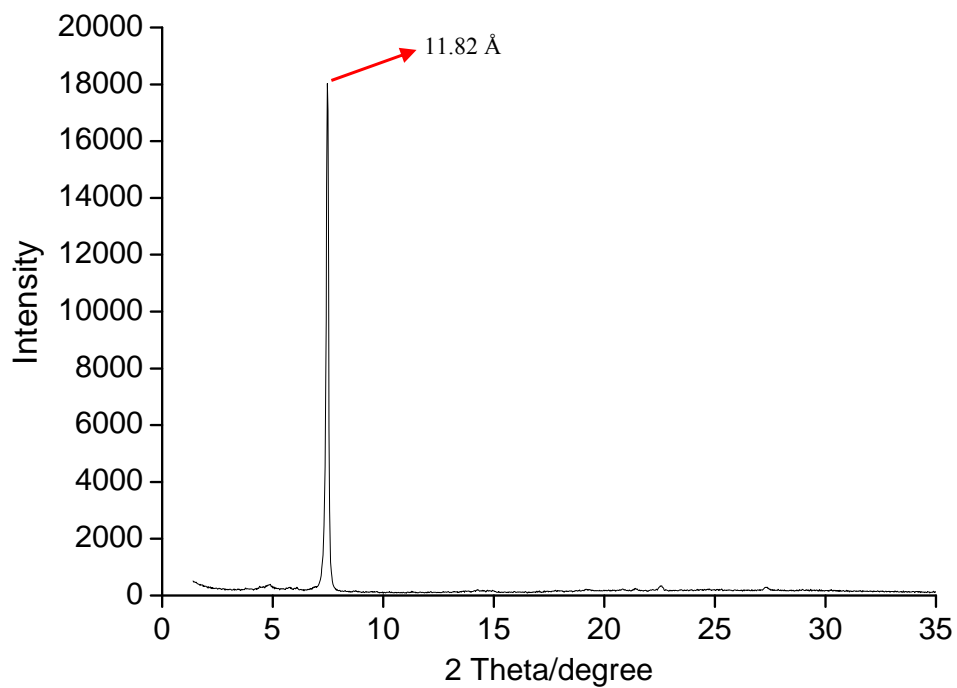

**Figure S3.** XRD pattern of nanoplates formed by **3** in DMSO/ethyl acetate.

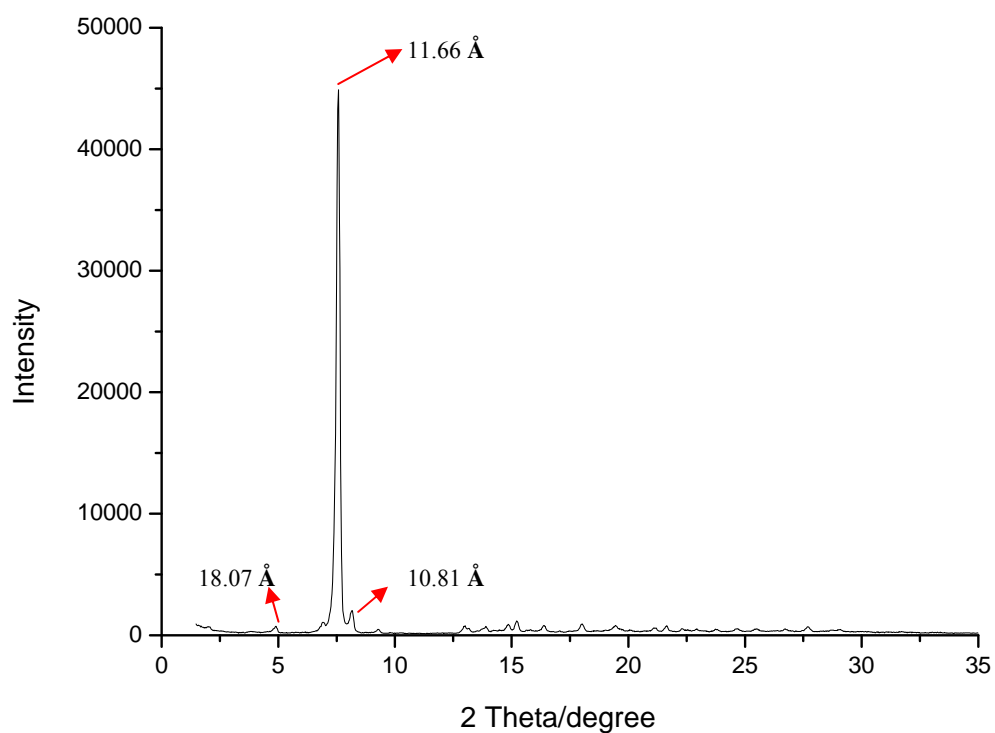

**Figure S4.** XRD pattern of nanoplates formed by **3** in DMSO/ether.

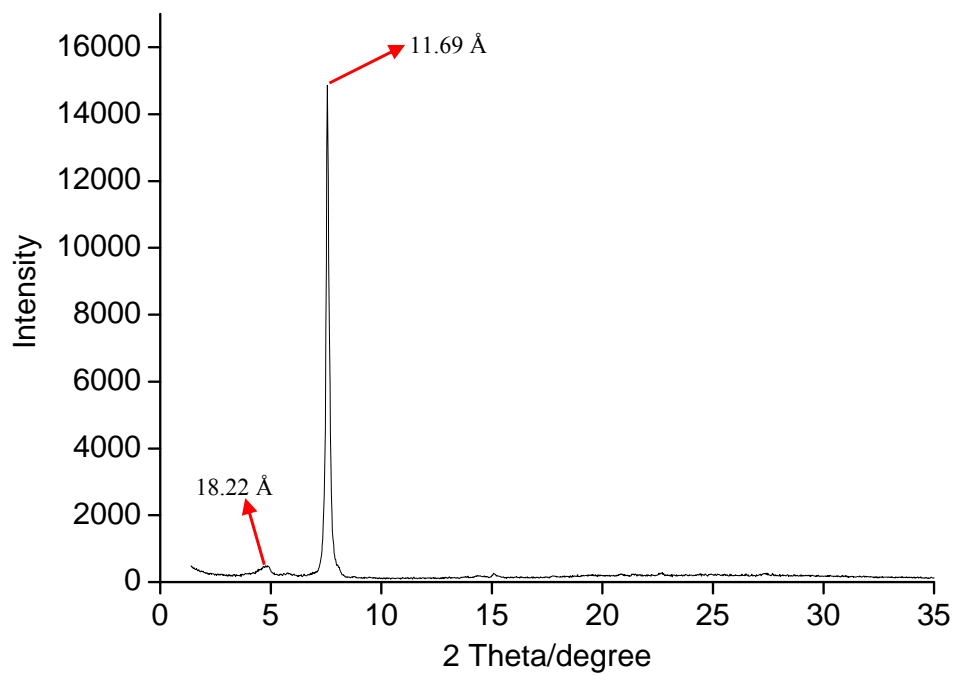

**Figure S5.** XRD pattern of nanoplates formed by **3** in DMSO/tetrahydrofuran.

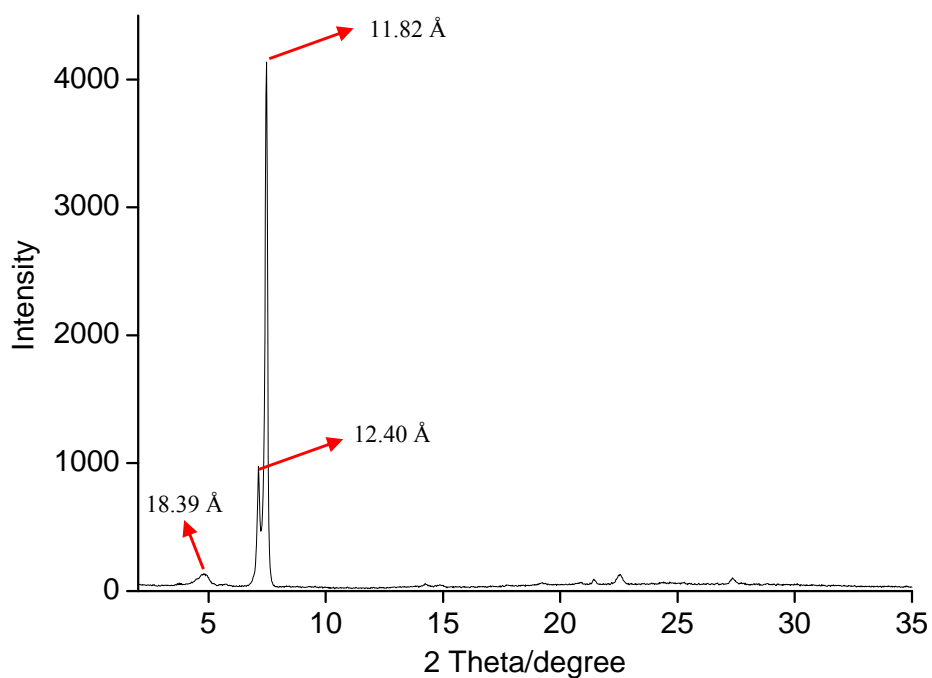

**Figure S6.** XRD pattern of nanoplates formed by **3** in DMSO/acetone.



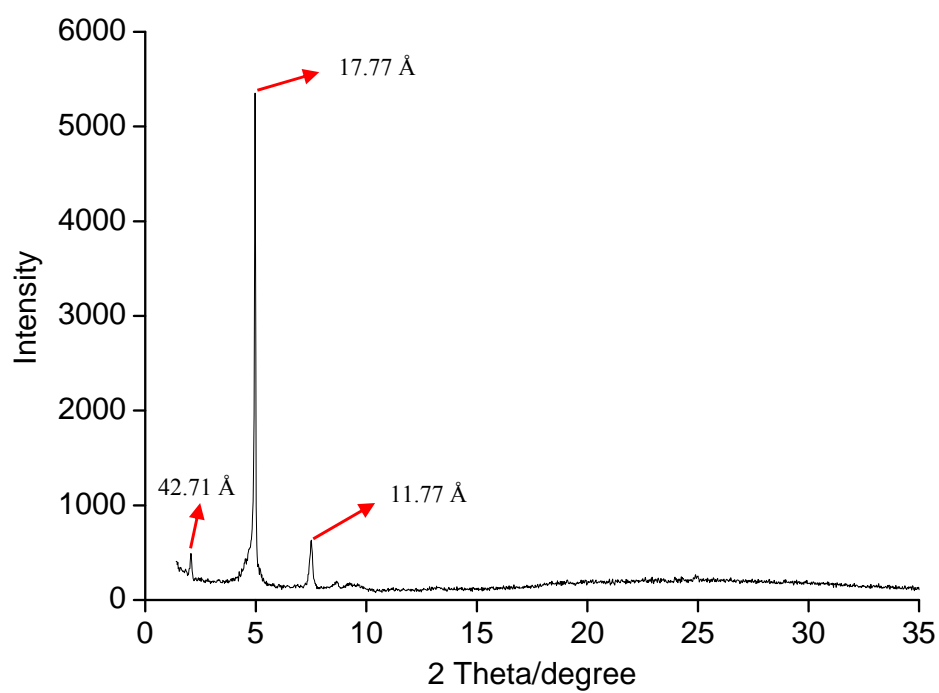

**Figure S7.** XRD pattern of nanoplates formed by **3** in DMSO/acetonitrile.

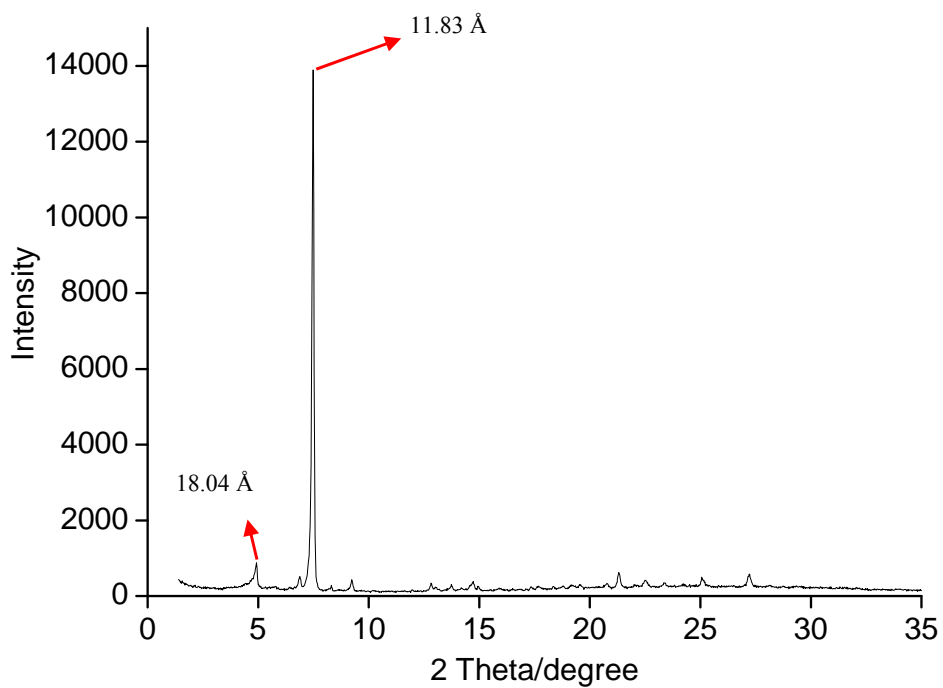

**Figure S8.** XRD pattern of nanoplates formed by **3** in DMSO/EtOH
